# Supplementary material for: Macroevolutionary Trade-Offs and Trends in Life History Traits of Cephalopods Through a Comparative Phylogenetic Approach
Source: Frontiers journal article supplement (doi:10.3389/fmars.2021.707825), 2021-09-03
Supplement: Table_1.DOCX [file Table_1.DOCX]

**Table S1.** Biological traits of cephalopods species included in this study. Body length (BL, maximum mantle length for coleoids and maximum shell diameter for nautiloids, mm), egg length (EL, mm), and potential fecundity (PF, number of mature oocytes in the ovary prior to spawning).

| **Species** | **Body length (mm)** | **Potential Fecundity** | **Egg length (mm)** | **Life style** | **References** |
| --- | --- | --- | --- | --- | --- |
| *Abralia veranyi* | 50 | 26584 | 1.01 | Pelagic | Jereb & Roper 2010; Salman & Laptikhovsky 2005 |
| *Adelieledone piatkowski* | 55 | 62 | 16 | Benthic | Jereb et al. 2014; Barrat et al. 2008; Schwarz et al. 2019 |
| *Adelieledone polymorpha* | 60 | 128 | 16.6 | Benthic | Jereb et al. 2014; Barrat et al. 2008 |
| *Amphioctopus aegina* | 100 | 10000 | 2.4 | Benthic | Jereb et al. 2014 |
| *Architeuthis dux* | 3000 | 10000000 | 1.4 | Pelagic | Jereb & Roper 2010 |
| *Argonauta nodosus* | 138 | 179500 | 1.7 | Pelagic | Jereb et al. 2014; Finn 2013 |
| *Bathypolypus arcticus* | 70 | 80 | 18 | Benthic | Jereb et al. 2014 |
| *Bathypolypus valdiviae* | 50 | 141 | 3.8 | Benthic | Jereb et al. 2014; Barratt et al. 2007 |
| *Bathyteuthis abyssicola* | 75 | 360 | 5 | Pelagic | Jereb & Roper 2010 |
| *Bathyteuthis berryi* | 50 | 360 | 4 | Pelagic | Jereb & Roper 2010; Bush et al. 2012 |
| *Batoteuthis skolops* | 350 | 4800 | 1.5 | Pelagic | Jereb & Roper 2010; Laptikhovsky et al. 2019 |
| *Benthoctopus eureka* | 110 | 140 | 19 | Benthic | Gleadall et al. 2010 |
| *Benthoctopus normani* | 63 | 71 | 22 | Benthic | Barrat et al. 2007 |
| *Berryteuthis magister* | 430 | 96000 | 3.6 | Pelagic | Jereb & Roper 2010; Nesis 1999 |
| *Callistoctopus ornatus* | 130 | 35000 | 4 | Benthic | Jereb et al. 2014; Norman 1993 |
| *Cirrothauma murrayi* | 220 | 200 | 14 | Pelagic | Aldred et al. 1983 |
| *Doryteuthis opalescens* | 305 | 4250 | 2.25 | Pelagic | Jereb & Roper 2010 |
| *Doryteuthis pealeii* | 303 | 53000 | 1.6 | Pelagic | Jereb & Roper 2010 |
| *Dosidicus gigas* | 1200 | 32000000 | 1.1 | Pelagic | Jereb & Roper 2010 |
| *Eledone cirrhosa* | 150 | 54000 | 7.5 | Benthic | Jereb et al. 2014 |
| *Enteroctopus dofleini* | 600 | 100000 | 8 | Benthic | Jereb et al. 2014; Sweeney et al. 1992 |
| *Eucleoteuthis luminosa* | 227 | 625000 | 1 | Pelagic | Jereb & Roper 2010 |
| *Euprymna hyllebergi* | 35 | 464 | 4.15 | Pelagic | Jereb & Roper 2005; Nabhitabhata et al. 2005 |
| *Euprymna scolopes* | 30 | 250 | 2.1 | Pelagic | Jereb & Roper 2005; Singley, 1983; Hanlon et al. 1997 |
| *Euprymna tasmanica* | 40 | 470 | 3.7 | Pelagic | Jereb & Roper 2005; Hoving et al. 2008; Nabhitabhata & Nishiguchi 2014 |
| *Gonatopsis octopedatus* | 175 | 414 | 6.5 | Pelagic | Jereb & Roper 2010 |
| *Gonatus antarcticus* | 350 | 30000 | 3.25 | Pelagic | Jereb & Roper 2010; Laptikhovsky et al. 2007 |
| *Gonatus fabricii* | 400 | 10000 | 4.5 | Pelagic | Jereb & Roper 2010; Kristensen, 1981 |
| *Graneledone boreopacifica* | 145 | 51 | 40 | Benthic | Jereb et al. 2014; Barrat et al. 2008 |
| *Graneledone verrucosa* | 110 | 80 | 17 | Benthic | Jereb et al. 2014; Barrat et al. 2008 |
| *Hapalochlaena maculosa* | 57 | 80 | 9 | Benthic | Jereb et al. 2014; Morse et al. 2018 |
| *Heterololigo bleekeri* | 301 | 2000 | 3.1 | Pelagic | Jereb & Roper 2010 |
| *Histioteuthis bonellii* | 330 | 275000 | 2.3 | Pelagic | Jereb & Roper 2010; Kristensen, 1980; Laptikhovsky 2001 |
| *Histioteuthis miranda* | 270 | 148000 | 1.5 | Pelagic | Jereb & Roper 2010; Hoving & Lipinski 2009 |
| *Histioteuthis reversa* | 200 | 64000 | 1.65 | Pelagic | Jereb & Roper 2010; Laptikhovsky 2001 |
| *Idiosepius pygmaeus* | 20 | 640 | 0.9 | Pelagic | Jereb & Roper 2005; Natsukari 1970; Lewis & Choat 1993 |
| *Illex coindetii* | 379 | 200000 | 0.9 | Pelagic | Jereb & Roper 2010 |
| *Japetella diaphana* | 85 | 2000 | 3 | Pelagic | Jereb et al. 2014; Sweeney et al. 1992; Schwarz et al. 2019 |
| *Loligo forbesii* | 462 | 23000 | 6 | Pelagic | Jereb & Roper 2010 |
| *Loligo vulgaris* | 485 | 74200 | 2.2 | Pelagic | Jereb & Roper 2010 |
| *Lycoteuthis lorigera* | 190 | 50000 | 1.9 | Pelagic | Jereb & Roper 2010; Hoving et al. 2014 |
| *Mastigoteuthis agassizii* | 100 | 16000 | 2 | Pelagic | Jereb & Roper 2010; Laptikhovsky et al. 2019 |
| *Megaleledone setebos* | 280 | 340 | 42 | Benthic | Jereb et al. 2014; Allcock et al. 2003; Schwarz et al. 2019 |
| *Mesonychoteuthis hamiltoni* | 3000 | 4200000 | 3 | Pelagic | Jereb & Roper 2010 |
| *Nautilus macromphalus* | 160 | 20 | 45 | Pelagic | Jereb & Roper 2005 |
| *Nautilus pompilius* | 180 | 20 | 25 | Pelagic | Jereb & Roper 2005 |
| *Octopoteuthis sicula* | 200 | 216000 | 1.5 | Pelagic | Jereb & Roper 2010; Hoving et al. 2008 |
| *Octopus bimaculoides* | 70 | 750 | 14.5 | Benthic | Jereb et al. 2014 |
| *Octopus cyanea* | 160 | 100000 | 3 | Benthic | Jereb et al. 2014; Norman 1991 |
| *Octopus ocellatus* | 80 | 1000 | 13 | Benthic | Jereb et al. 2014 |
| *Octopus rubescens* | 100 | 50000 | 4 | Benthic | Jereb et al. 2014 |
| *Octopus vulgaris* | 250 | 500000 | 2 | Benthic | Jereb et al. 2014 |
| *Ommastrephes bartramii* | 900 | 360000 | 1 | Pelagic | Jereb & Roper 2010 |
| *Onychoteuthis banksii* | 300 | 200000 | 0.5 | Pelagic | Jereb & Roper 2010 |
| *Onykia robusta* | 2300 | 240000 | 1 | Pelagic | Jereb & Roper 2010; Несис, 1971; Kurita 2018 |
| *Opisthoteuthis massyae* | 75 | 2763 | 10 | Pelagic | Villanueva et al. 2002 |
| *Ornithoteuthis antillarum* | 300 | 220000 | 1 | Pelagic | Jereb & Roper 2010 |
| *Pareledone aequipapillae* | 63 | 40 | 20 | Benthic | Barrat et al. 2008; Schwarz et al. 2019 |
| *Pareledone charcoti* | 43 | 94 | 13 | Benthic | Barrat et al. 2008; Schwarz et al. 2019 |
| *Pareledone felix* | 60 | 54 | 22 | Benthic | Barrat et al. 2008 |
| *Pareledone turqueti* | 100 | 135 | 20 | Benthic | Jereb et al. 2014 |
| *Rondeletiola minor* | 23 | 315 | 1.5 | Pelagic | Jereb & Roper 2005; Neaf 1928; Önsoy et al. 2013 |
| *Rossia macrosoma* | 85 | 837 | 8 | Pelagic | Jereb & Roper 2005 |
| *Rossia pacifica* | 90 | 1246 | 10 | Pelagic | Jereb & Roper 2005; Laptikhovsky et al. 2008 |
| *Rossia palpebrosa* | 45 | 270 | 10 | Pelagic | Jereb & Roper 2005; Golikov et al. 2017 |
| *Sepia elegans* | 89 | 250 | 5 | Pelagic | Jereb & Roper 2005 |
| *Sepia officinalis* | 490 | 4000 | 8 | Pelagic | Jereb & Roper 2005 |
| *Sepia pharaonis* | 420 | 1525 | 15 | Pelagic | Jereb & Roper 2005 |
| *Sepiella inermis* | 125 | 500 | 3.7 | Pelagic | Jereb & Roper 2005 |
| *Sepiella japonica* | 180 | 480 | 4 | Pelagic | Jereb & Roper 2005 |
| *Sepiola affinis* | 25 | 117 | 1.8 | Pelagic | Jereb & Roper 2005 |
| *Sepiola atlantica* | 21 | 304 | 3.8 | Pelagic | Jereb & Roper 2005 |
| *Sepiola intermedia* | 28 | 407 | 2.9 | Pelagic | Jereb & Roper 2005; Hoving et al. 2008 |
| *Sepiola robusta* | 28 | 245 | 2.3 | Pelagic | Jereb & Roper 2005; Boletzky 1983; Hoving et al. 2008 |
| *Sepioteuthis australis* | 394 | 300 | 70 | Pelagic | Jereb & Roper 2010 |
| *Sepioteuthis lessoniana* | 382 | 635 | 6 | Pelagic | Jereb & Roper 2010; Choe, 1966 |
| *Spirula spirula* | 45 | 100 | 1.7 | Pelagic | Jereb & Roper 2005 |
| *Stauroteuthis gilchristi* | 70 | 746 | 9.5 | Pelagic | Collins & Henriques, 2000 |
| *Stauroteuthis syrtensis* | 114 | 900 | 11 | Pelagic | Collins & Henriques, 2000 |
| *Sthenoteuthis oualaniensis* | 650 | 22000000 | 0.8 | Pelagic | Jereb & Roper 2010 |
| *Taningia danae* | 1700 | 5000000 | 1 | Pelagic | Jereb & Roper 2010; González et al. 2003 |
| *Thaumeledone rotunda* | 51 | 20 | 16 | Benthic | Barrat et al. 2008 |
| *Thysanoteuthis rhombus* | 1000 | 140000 | 1.8 | Pelagic | Jereb & Roper 2010 |
| *Todarodes pacificus* | 500 | 470000 | 0.95 | Pelagic | Jereb & Roper 2010 |
| *Todaropsis eblanae* | 290 | 250000 | 2.5 | Pelagic | Jereb & Roper 2010 |
| *Tremoctopus violaceus* | 250 | 300000 | 2 | Pelagic | Jereb et al. 2014; Laptikhovsky & Salman 2003 |
| *Uroteuthis chinensis* | 310 | 11000 | 2 | Pelagic | Jereb & Roper 2010 |
| *Vampyroteuthis infernalis* | 100 | 20711 | 4 | Pelagic | Jereb et al. 2014; Hoving et al. 2015 |
| *Velodona togata* | 150 | 122 | 30 | Benthic | Jereb et al. 2014; Silva et al. 2014 |
| *Watasenia scintillans* | 70 | 20000 | 1.5 | Pelagic | Jereb & Roper 2010 |

**References**

Aldred, R. G., Nixon, M., & Young, J. Z. (1983). *Cirrothauma murrayi* Chun, a finned octopod. Philosophical Transactions of the Royal Society of London. B, Biological Sciences, 301(1103), 1-54.

Allcock, A. L., Hochberg, F. G., & Stranks, T. N. (2003). Re-evaluation of *Graneledone setebos* (Cephalopoda: Octopodidae) and allocation to the genus *Megaleledone*. Marine Biological Association of the United Kingdom. Journal of the Marine Biological Association of the United Kingdom, 83(2), 319.

Barratt, I. M., Johnson, M. P., & Allcock, A. L. (2007). Fecundity and reproductive strategies in deep-sea incirrate octopuses (Cephalopoda: Octopoda). Marine Biology, 150(3), 387-398.

Barratt, I. M., Johnson, M. P., Collins, M. A., & Allcock, A. L. (2008). Female reproductive biology of two sympatric incirrate octopod species, *Adelieledone polymorpha* (Robson 1930) and *Pareledone turqueti* (Joubin 1905)(Cephalopoda: Octopodidae), from South Georgia. Polar Biology, 31(5), 583-594.

Boletzky Sv (1983) *Sepiola robusta*. In: Boyle PR (ed.) Cephalopod Life Cycles, Vol. I. Academic Press, London, pp 53-67

Boyle, P., & Rodhouse, P. G. K. (2005). Cephalopods. Ecology and fisheries. Oxford, England: Blackwell Publishing.

Bush, S.L., Hoving, H.J., Huffard, C.L., Robison, B.H., Zeidberg, L.D., 2012. Brooding and sperm storage by the deep-sea squid *Bathyteuthis berryi* (Cephalopoda: Decapodiformes). J. Mar. Biol. Assoc. U. K. 92(07), 1629-1636.

Choe, S. 1966. On the eggs, rearing, habits of the fry and growth of some Cephalopods. Bulletin of Marine Science, 16: 330–348.

Collins M.A. & Henriques, C. 2000. A revision of the family Stauroteuthidae (Octopoda: Cirrata) with redescriptions of *Stauroteuthis syrtensis* and *S. gilchristi*. Journal of the Marine Biological Association of the United Kingdom 80, 685–697.

Finn, J.K. (2013). Taxonomy and biology of the argonauts (Cephalopoda: Argonautidae) with particular reference to Australian material, Molluscan Research, 33:3, 143-222.

Gleadall, I. G., Guerrero-Kommritz, J., Hochberg, F. G., and Laptikhovsky, V. V. (2010). The inkless octopuses (Cephalopoda: Octopodidae) of the Southwest Atlantic. Zool. Sci. 27, 528–553.

Golikov, A. V., Sabirov, R. M., & Lubin, P. A. (2017). First assessment of biomass and abundance of cephalopods *Rossia palpebrosa* and *Gonatus fabricii* in the Barents Sea. Marine Biological Association of the United Kingdom. Journal of the Marine Biological Association of the United Kingdom, 97(8), 1605.

González, A. F., Guerra, A., & Rocha, F. (2003). New data on the life history and ecology of the deep-sea hooked squid *Taningia danae*. Sarsia, 88(4), 297-301.

Hanlon, R.T., Claes, M.F., Ashcraft, S.E. & Dunlap, P.V. 1997. Laboratory culture of the sepiolid squid Euprymna scolopes: a model system for bacterial-animal symbiosis. Biological Bulletin, 192: 364–374.

Hoving, H. J. T., & Lipiński, M. R. (2009). Female reproductive biology, and age of deep-sea squid *Histioteuthis miranda* from southern Africa. ICES Journal of Marine Science, 66(9), 1868-1872.

Hoving, H. J. T., Laptikhovsky, V., Piatkowski, U., & Önsoy, B. (2008). Reproduction in *Heteroteuthis dispar* (Rüppell, 1844)(Mollusca: Cephalopoda): a sepiolid reproductive adaptation to an oceanic lifestyle. Marine Biology, 154(2), 219-230.

Hoving, H.J.T., Laptikhovsky, V.V., Robison, B.H. 2015. Vampire squid reproductive strategy is unique among coleoid cephalopods. Curr. Biol. 25(8), R322-R323.

Jereb, P., & Roper, C. (2005). Cephalopods of the world. An Annotated and Illustrated catalogue of Cephalopod species known to date. Vol. 1. Chambered nautiluses and sepioids (Nautilidae, Sepiidae, Sepiolidae, Sepiadariidae, Idiosepiidae and Spirulidae). Rome, Italy: FAO Species Catalogue for Fishery Purposes.

Jereb, P., & Roper, C. (2010). Cephalopods of the world. An annotated and Illustrated catalogue of species known to date. FAO Species Catalogue for Fishery Purposes. Rome, Italy: FAO Species Catalogue for Fishery Purposes.

Jereb, P., Roper, C. F. E., Norman, M. D., and Finn, J. K. (2014). Cephalopods of the World. An Annotated and Illustrated Catalogue of Cephalopod Species Known to Date. Volume 3. Octopods and Vampire Squids. Rome: FAO Species Catalogue for Fishery Purposes, 370.

Kristensen, T.K. 1980. Multivariate statistical analysis of geographic variation in the squid *Gonatus fabricii* (Lichtenstein, 1818) (Mollusca, Cephalopoda). Haliotis, 10(2): 83.

Kristensen, T.K. 1981. First record of a mature female of the squid *Gonatus fabricii* (Lichtenstein, 1818) (Cephalopoda: Teuthoidea). Steenstrupia, 7(5): 101–108.

Kurita, Y. (2018). Biological report of a giant deep-sea squid *Onykia robusta* collected from the Sanriku Coast, Japan: implications for low genetic diversity. Marine Biodiversity, 48(1), 685-688.

Laptikhovsky, V. V. 2001. First data on ovary maturation and fecundity in the squid family Histioteuthidae. Scientia Marina, 65: 127–129.

Laptikhovsky, V. V., Arkhipkin, A. I., & Hoving, H. J. T. (2007). Reproductive biology in two species of deep-sea squids. Marine Biology, 152(4), 981-990.

Laptikhovsky, V. V., Nigmatullin, C. M., Hoving, H. J. T., Onsoy, B., Salman, A., Zumholz, K., & Shevtsov, G. A. (2008). Reproductive strategies in female polar and deep-sea bobtail squid genera *Rossia* and *Neorossia* (Cephalopoda: Sepiolidae). Polar Biology, 31(12), 1499-1507.

Laptikhovsky, V., & Salman, A. (2003). On reproductive strategies of the epipelagic octopods of the superfamily Argonautoidea (Cephalopoda: Octopoda). Marine Biology, 142(2), 321-326.

Laptikhovsky, V.L., Nikolaeva, S., Rogov, M., 2019. Cephalopod embryonic shells as a tool to reconstruct reproductive strategies in extinct taxa. Biol. Rev. 93, 270-283.

Lewis, A.R. & Choat, J.H. 1993. Spawning mode and reproductive output of the tropical cephalopod *Idiosepius pygmaeus*. Canadian Journal of Fisheries and Aquatic Sciences, 50(1): 20–28.

Morse, P., Huffard, C. L., Meekan, M. G., McCormick, M. I., & Zenger, K. R. (2018). Mating behaviour and postcopulatory fertilization patterns in the southern blue-ringed octopus, Hapalochlaena maculosa. Animal Behaviour, 136, 41-51.

Nabhitabhata, J., Nilaphat, P., Promboon, P., & Jaroongpattananon, C. (2005). Life cycle of cultured bobtail squid, *Euprymna hyllebergi* Nateewathana, 1997. Phuket Mar Biol Cent Res Bull, 66, 351-365.

Nabhitabhata, J., Nishiguchi, M. (2014). *Eupryma hyllebergi* and *Euprymna tasmanica*. In book: Cephalopod Culture Chapter: 15, Publisher: Springer.

Naef, A. (1928). Die Cephalopoden. Embryologie. Die Fauna Flora Golf Neapel, 35(2), 1-357.

Natsukari, Y. 1970. Egg-laying behaviour, embryonic development and hatched larva of the pygmy cuttlefish, *Idiosepius pygmaeus* paradoxus Ortmann. Bulletin of the Faculty of Fisheries, Nagasaki University, 30: 15–29.

Nesis, K.N. (1999) The duration of egg incubation in high-latitude and deep-sea cephalopods. Russian Journal of Marine Biology, 25(6): 499-506.

Norman, M. D. (1991). *Octopus cyanea* Gray, 1849 (Mollusca: Cephalopoda) in Australian waters: description, distribution and taxonomy. Bulletin of Marine Science, 49(1-2), 20-38.

Norman, M. D. (1993). *Octopus ornatus* Gould, 1852 (Cephalopoda: Octopodidae) in Australian waters: morphology, distribution, and life history. Proceedings of the Biological Society of Washington, 106(4), 645-660.

Önsoy, B., Ceylan, B., & Salman, A. (2013). Reproductive biology of the lentil bobtail squid, *Rondeletiola minor* (Cephalopoda: Sepiolidae) from the eastern Mediterranean. Marine Biological Association of the United Kingdom. Journal of the Marine Biological Association of the United Kingdom, 93(3), 851.

Salman, A., & Laptikhovsky, V. (2005). Fecundity and spawning of *Abralia verany* (Rüppell, 1844)(Cephalopoda: Enoploteuthidae) in the Aegean Sea. Scientia Marina, 69(2), 211-214.

Schwarz, R., Hoving, H. J., Noever, C., & Piatkowski, U. (2019). Life histories of Antarctic incirrate octopods (Cephalopoda: Octopoda). PloS one, 14(7), e0219694.

Silva, L., Sobrino, I., & Hernández, E. (2014). Deep-sea incirrate octopus *Velodona togata* (Chun, 1915) in waters off Mozambique (SW Indian Ocean): Reproductive biology, distribution, and abundance. Fisheries Research, 152, 98-105.

Sweeney MJ, Roper CFE, Mangold KM, Clarke MR, Boletzky SV. 1992. “Larval” and juvenile cephalopods: a manual for their identification. Smithson Contrib Zool. 513:1–182.

Villanueva, R., Collins, M. A., Sánchez, P., & Voss, N. A. (2002). Systematics, distribution and biology of the cirrate octopods of the genus *Opisthoteuthis* (Mollusca, Cephalopoda) in the Atlantic Ocean, with description of two new species. Bulletin of Marine Science, 71(2), 933-985.
