# Supplementary material for: Macroevolutionary Trade-Offs and Trends in Life History Traits of Cephalopods Through a Comparative Phylogenetic Approach
Source: Frontiers journal article supplement (doi:10.3389/fmars.2021.707825), 2021-09-03
Supplement: Table_2.DOCX [file Table_2.DOCX]

**Table S2.** Cephalopod species from Lindgren et al. (2012) excluded from the analyses in this study. Body length (BL, maximum mantle length for coleoids and maximum shell diameter for nautiloids, mm), egg length (EL, mm), and potential fecundity (PF, number of mature oocytes in the ovary prior to spawning).

| **Species** | **Body length (mm)** | **Potential Fecundity** | **Egg length (mm)** | **References** |
| --- | --- | --- | --- | --- |
| *Abraliopsis pacificus* | 36 |  | 1 | Jereb & Roper 2010; Laptikhovsky 1999 |
| *Ancistroteuthis lichtensteinii* | 300 |  |  | Jereb & Roper 2010; Laptikhovsky 1999 |
| *Architeuthis sp ARL 2008* |  |  |  |  |
| *Architeuthis sp JMS 2004* |  |  |  |  |
| *Asperoteuthis nesisi* | 64 |  |  | Braid 2017 |
| *Bathypolypus sp JMS 2004* |  |  |  |  |
| *Bathyteuthis sp A* |  |  |  |  |
| *Benthoctopus johnsonianus* | 113 |  |  | Gleadall et al. 2010 |
| *Benthoctopus sp A JMS 2004* |  |  |  |  |
| *Benthoctopus sp JMS 2004* |  |  |  |  |
| *Benthoctopus yaquinae* | 83 |  | 12 | Voss & Pearcy 1990 |
| *Berryteuthis anonychus* | 150 |  |  | Jereb & Roper 2010 |
| *Bolitaena pygmaea* | 60 |  | 2 | Jereb et al. 2014; Young 1972; Sweeney et al. 1992 |
| *Brachioteuthis sp 2* |  |  |  |  |
| *Brachioteuthis sp 3* |  |  |  |  |
| *Chiroteuthis calyx* | 100 |  |  | Jereb & Roper 2010 |
| *Chiroteuthis mega* | 100 |  |  | Jereb & Roper 2010 |
| *Chiroteuthis veranyi* | 200 |  | 4.5 | Jereb & Roper 2010; Cuccu et al. 2009 |
| *Chtenopteryx sicula* | 100 |  | 1.5 | Jereb & Roper 2010; Несис, 1985 |
| *Chtenopteryx sp ARL 2008* |  |  |  |  |
| *Cistopus sp JMS 2004* |  |  |  |  |
| *Cranchia scabra* | 150 |  |  | Jereb & Roper 2010 |
| *Cycloteuthis sirventyi* | 500 |  |  | Jereb & Roper 2010 |
| *Discoteuthis discus* | 90 |  |  | Jereb & Roper 2010 |
| *Discoteuthis laciniosa* | 70 |  |  | Jereb & Roper 2010 |
| *Enoploteuthis higginsi* | 60 |  | 1.2 | Jereb & Roper 2010; Burgess, 1982 |
| *Enoploteuthis leptura* | 92 |  |  | Jereb & Roper 2010 |
| *Euprymna berryi* | 50 |  | 6.3 | Jereb & Roper 2005; Choe, 1966 |
| *Galiteuthis armata* | 610 |  |  | Jereb & Roper 2010 |
| *Galiteuthis sp JMS 2004* |  |  |  |  |
| *Gonatopsis sp ARL 2008* |  |  |  |  |
| *Graneledone antarctica* | 45 |  |  | Jereb et al. 2014 |
| *Grimalditeuthis bonplandi* | 250 |  |  | Jereb & Roper 2010 |
| *Haliphron atlanticus* | 690 |  | 16 | Jereb et al. 2014; O'Shea 2004 |
| *Heteroteuthis hawaiiensis* | 30 |  |  | Jereb & Roper 2005 |
| *Histioteuthis corona* | 190 |  |  | Jereb & Roper 2010 |
| *Histioteuthis hoylei* | 240 |  |  | Jereb & Roper 2010 |
| *Histioteuthis oceanica* | 70 |  |  | Jereb & Roper 2010 |
| *Idiosepius notoides* | 25 |  | 1 | Jereb & Roper 2005; Laptikhovsky et al. 2018 |
| *Joubiniteuthis portieri* | 64 |  |  | Jereb & Roper 2010 |
| *Kondakovia sp ARL 2008* |  |  |  |  |
| *Leachia atlantica* | 200 |  |  | Jereb & Roper 2010; Norman 2000 |
| *Leachia lemur* | 200 |  |  | Jereb & Roper 2010; Norman 2000 |
| *Lepidoteuthis grimaldii* | 100 |  |  | Jereb & Roper 2010; Young 1991 |
| *Loliolus sp JMS 2004* |  |  |  |  |
| *Lolliguncula brevis* | 120 |  | 1.8 | Jereb & Roper 2010; Hall 1970 |
| *Lolliguncula diomedeae* | 115 |  | 4.1 | Jereb & Roper 2010; Fernández-Álvarez et al. 2017 |
| *Magnapinna sp ARL 2008* |  |  |  |  |
| *Mastigoteuthis hjorti* | 100 |  |  | Jereb & Roper 2010 |
| *Mastigoteuthis magna* | 160 |  |  | Jereb & Roper 2010 |
| *Megalocranchia fisheri* | 1800 |  |  | Tsuchiya and Okutani, 1993 |
| *Megalocranchia sp ARL 2008* |  |  |  |  |
| *Metasepia tullbergi* | 70 |  |  | Jereb & Roper 2005 |
| *Moroteuthis knipovitchi* | 450 |  |  | Jereb & Roper 2010 |
| *Neoteuthis thielei* | 100 |  |  | Jereb & Roper 2010 |
| *Notonykia sp ARL 2008* |  |  |  |  |
| *Octopoteuthis megaptera* | 200 |  |  | Jereb & Roper 2010 |
| *Octopoteuthis nielseni* | 200 |  |  | Jereb & Roper 2010 |
| *Octopus berrima* | 105 |  | 14 | Jereb et al. 2014 |
| *Octopus kaurna* | 85 |  | 11 | Jereb et al. 2014 |
| *Onychoteuthis sp B3 JMS 2004* |  |  |  |  |
| *Onykia carriboea* | 100 |  |  | Jereb & Roper 2010 |
| *Pareledone albimaculata* | 38 |  | 10 | Barrat et al. 2008 |
| *Pareledone aurata* | 49 |  | 11 | Barrat et al. 2008 |
| *Pareledone cornuta* | 60 |  | 20 | Barrat et al. 2008 |
| *Pareledone panchroma* | 43 |  | 14 | Barrat et al. 2008 |
| *Pareledone serperastrata* | 36 |  | 10 | Barrat et al. 2008 |
| *Pareledone subtilis* | 44 |  | 14 | Barrat et al. 2008 |
| *Pholidoteuthis adami* | 780 |  |  | Jereb & Roper 2010 |
| *Planctoteuthis levimana* | 70 |  |  | Jereb & Roper 2010 |
| *Psychroteuthis glacialis* | 440 |  |  | Jereb & Roper 2010 |
| *Pterygioteuthis gemmata* | 40 |  |  | Jereb & Roper 2010 |
| *Pterygioteuthis giardi hoylei* | 31 |  |  | Lindgren 2010 |
| *Pterygioteuthis microlampas* | 28 |  |  | Lindgren 2010 |
| *Selenoteuthis scintillans* | 45 |  | 1.5 | Jereb & Roper 2010; Okiyama, 1993 |
| *Sepia apama* | 500 |  | 17.7 | Jereb & Roper 2005 |
| *Sepia esculenta* | 180 |  | 17.1 | Jereb & Roper 2005; Nesis 1985; Choe, 1966 |
| *Sepia kobiensis* | 90 |  |  | Jereb & Roper 2005 |
| *Sepia latimanus* | 500 |  | 24 | Jereb & Roper 2005; Nesis 1985 |
| *Sepia lorigera* | 250 |  |  | Jereb & Roper 2005 |
| *Sepia lycidas* | 380 |  | 32 | Jereb & Roper 2005 |
| *Sepia pardex* | 230 |  |  | Jereb & Roper 2005 |
| *Sepia peterseni* | 120 |  |  | Jereb & Roper 2005 |
| *Sepia recurvirostra* | 170 | 1370 |  | Jereb & Roper 2005; Dar 2010 |
| *Sepia sp SI0604* |  |  |  |  |
| *Sepiadarium austrinum* | 30 |  |  | Jereb & Roper 2005 |
| *Sepiadarium kochi* | 30 |  |  | Jereb & Roper 2005 |
| *Sepietta neglecta* | 33 |  | 2.1 | Jereb & Roper 2005; Lefcaditou & Kaspiris, 1998 |
| *Sepietta obscura* | 30 |  | 4.5 | Jereb & Roper 2005 |
| *Sepiola birostrata* | 22 |  |  | Jereb & Roper 2005 |
| *Sepiola ligulata* | 25 |  | 2.6 | Jereb & Roper 2005; Naef 1928 |
| *Sepiola sp JMS 2004* |  |  |  |  |
| *Sepiolina nipponensis* | 25 |  |  | Jereb & Roper 2005 |
| *Sepioloidea lineolata* | 50 |  | 10 | Jereb & Roper 2005; Dew 1959 |
| *Stoloteuthis leucoptera* | 18 |  | 2.8 | Jereb & Roper 2005; Villanueva & Sanchez 1993 |
| *Taonius pavo* | 660 |  |  | Jereb & Roper 2010 |
| *Teuthowenia megalops* | 400 |  |  | Jereb & Roper 2010 |
| *Thaumeledone gunteri* | 41 |  | 10 | Barrat et al. 2008 |
| *Thaumeledone peninsulae* | 48 |  | 13 | Barrat et al. 2008 |
| *Uroteuthis noctiluca* | 90 |  |  | Jereb & Roper 2010 |
| *Uroteuthis sp JMS 2004* |  |  |  |  |
| *Vitreledonella richardi* | 110 |  |  | Jereb et al. 2014; Silva et al. 2014 |

**References**

Barratt, I. M., Johnson, M. P., Collins, M. A., & Allcock, A. L. (2008). Female reproductive biology of two sympatric incirrate octopod species, *Adelieledone polymorpha* (Robson 1930) and *Pareledone turqueti* (Joubin 1905)(Cephalopoda: Octopodidae), from South Georgia. Polar Biology, 31(5), 583-594.

Braid, H. E. (2017). Resolving the taxonomic status of Asperoteuthis lui Salcedo-Vargas, 1999 (Cephalopoda, Chiroteuthidae) using integrative taxonomy. Marine Biodiversity, 47(3), 621-635.

Choe, S. 1966. On the eggs, rearing, habits of the fry and growth of some Cephalopods. Bulletin of Marine Science, 16: 330–348.

Gleadall, I. G., Guerrero-Kommritz, J., Hochberg, F. G., and Laptikhovsky, V. V. (2010). The inkless octopuses (Cephalopoda: Octopodidae) of the Southwest Atlantic. Zool. Sci. 27, 528–553.

Jereb, P., & Roper, C. (2005). Cephalopods of the world. An Annotated and Illustrated catalogue of Cephalopod species known to date. Vol. 1. Chambered nautiluses and sepioids (Nautilidae, Sepiidae, Sepiolidae, Sepiadariidae, Idiosepiidae and Spirulidae). Rome, Italy: FAO Species Catalogue for Fishery Purposes.

Jereb, P., & Roper, C. (2010). Cephalopods of the world. An annotated and Illustrated catalogue of species known to date. FAO Species Catalogue for Fishery Purposes. Rome, Italy: FAO Species Catalogue for Fishery Purposes.

Jereb, P., Roper, C. F. E., Norman, M. D., and Finn, J. K. (2014). Cephalopods of the World. An Annotated and Illustrated Catalogue of Cephalopod Species Known to Date. Volume 3. Octopods and Vampire Squids. Rome: FAO Species Catalogue for Fishery Purposes, 370.

Laptikhovsky, V. V. (1999). Fecundity and spawning in squid of families Enoploteuthidae and Ancistrocheiridae (Cephalopoda: Oegopsida). Scientia Marina, 63(1), 1-7.

Lindgren, A. R. (2010). Systematics and distribution of the squid genus Pterygioteuthis (Cephalopoda: Oegopsida) in the eastern tropical Pacific Ocean. Journal of Molluscan Studies, 76(4), 389-398.

Naef, A. (1928). Die Cephalopoden. Embryologie. Die Fauna Flora Golf Neapel, 35(2), 1-357.

Nesis, K.N. (1985). Oceanic cephalopods: Distribution, life forms, evolution. Moscow, Nauka Press.

Norman, M. D. 2000. Cephalopods: A world guide. Conch Books, Hackenheim, Germany.

O'Shea, S., Bolstad, K. S., & Ritchie, P. A. (2004). First records of egg masses of Nototodarus gouldi McCoy, 1888 (Mollusca: Cephalopoda: Ommastrephidae), with comments on egg‐mass susceptibility to damage by fisheries trawl. New Zealand Journal of Zoology, 31(2), 161-166.

Silva, L., Sobrino, I., & Hernández, E. (2014). Deep-sea incirrate octopus *Velodona togata* (Chun, 1915) in waters off Mozambique (SW Indian Ocean): Reproductive biology, distribution, and abundance. Fisheries Research, 152, 98-105.

Sweeney MJ, Roper CFE, Mangold KM, Clarke MR, Boletzky SV. 1992. “Larval” and juvenile cephalopods: a manual for their identification. Smithson Contrib Zool. 513:1–182.

Villanueva, R., & Sanchez, P. (1993). Cephalopods of the Benguela Current off Namibia: new additions and considerations on the genus Lycoteuthis. Journal of Natural History, 27(1), 15-46.

Voss, G. L., & Pearcy, W. G. (1990). Deep-water octopods (Mollusca: Cephalopoda) of the northeastern Pacific. Proceedings of the California Academy of Sciences, 47(3), 47-94.

Young, R. E. (1972). The systematics and areal distribution of pelagic cephalopods from the seas off southern California. Smithsonian Contributions to Zoology.
